# Supplementary material for: BSim: An Agent-Based Tool for Modeling Bacterial Populations in Systems and Synthetic Biology
Source: PLOS journal article supplement (doi:10.1371/journal.pone.0042790), 2012-08-24
Supplement: S10 (10.1371/journal.pone.0042790.s010) [file journal.pone.0042790.s010]

| Parameter  | Description                                                                   | Value                          |
|------------|-------------------------------------------------------------------------------|--------------------------------|
| $[O_T]$    | Total operator (bound & unbound) concentration                                | $1 \times 10^{-3} \mu\text{M}$ |
| $K_2[R_T]$ | Total repressor (bound & unbound) concentration $\times$ equilibrium constant | $1 \times 10^5$ dimensionless  |
| $K_1$      | Equilibrium constant                                                          | $0.012 \mu\text{M}^{-2}$       |
| $\delta$   | Facilitated transport coefficient                                             | $0.82 \text{ min}^{-1}$        |
| $\beta$    | Permease saturation constant                                                  | $500 \mu\text{M}$              |
| $k_2$      | Rate of dilution of $[Y]$ and $[I]$                                           | $0.0055 \text{ min}^{-1}$      |
| $\alpha$   | Permease turnover number                                                      | $60000 \text{ min}^{-1}$       |
| $k_1$      | Kinetic rate constant (permease generation)                                   | $9 \text{ min}^{-1}$           |
